# Supplementary material for: Characterization of Ca-Dicarboxylate Salt Hydrates as Thermochemical Energy Storage Materials
Source: MDPI journal article supplement (doi:10.3390/cryst13101518), 2023-10-19
Supplement: s1 [file s1]

Archive with 1 entries (1 files):
- crystals-2665104-supplementary.pdf
